# Supplementary material for: Effect of Elicitor Treatments on Quality Attributes in Blueberry: Implications of Cultivar and Environmental Conditions
Source: MDPI journal article supplement (doi:10.3390/plants13081105), 2024-04-15
Supplement: s1 [file s1]

Supplemental Table S2

Chromatogram integrated at 515 nm of blueberry fruits (*Vaccinium corymbosum* L) cv ‘Cosmopolitan’ containing both glycosylated anthocyanidins and acylated forms. For each detected compound is reported the retention time (RT, min),  $\lambda_{\text{max}}$  (nm), accurate mass of the  $[M]^+$ , brute formula and fragment ions  $[M]^+$ .

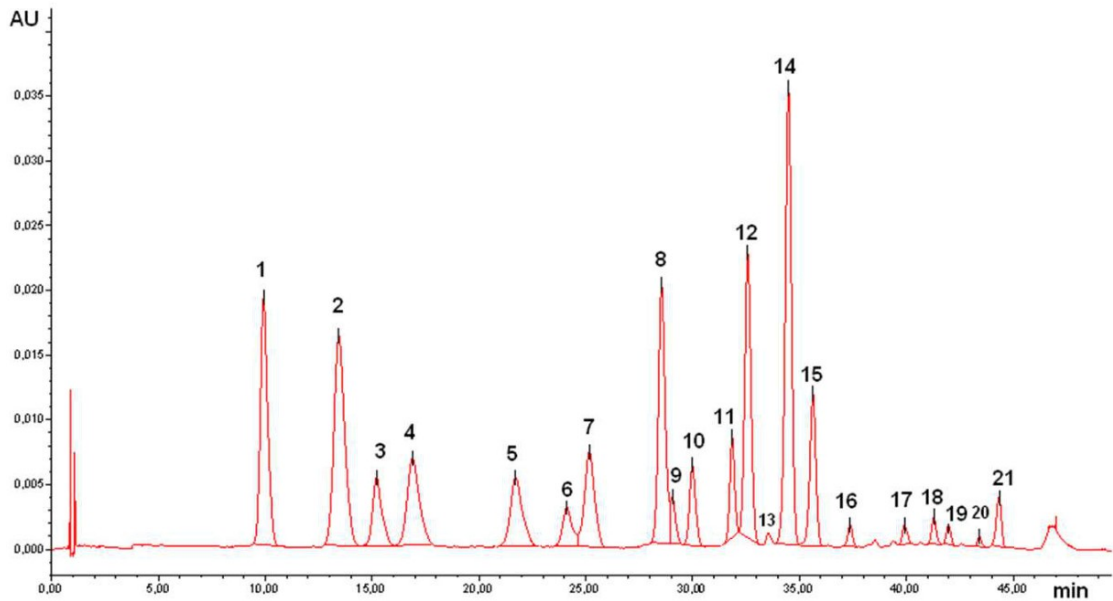

| Peak | RT (min) | $\lambda_{\text{max}}$ | $[M]^+$  | Brute Formula                                   | Fragment ions $[M]^+$ | Brute Formula                                  | Peak identification |
|------|----------|------------------------|----------|-------------------------------------------------|-----------------------|------------------------------------------------|---------------------|
| 1    | 10.0     | 515                    | 465.1026 | C <sub>21</sub> H <sub>21</sub> O <sub>12</sub> | 303.0499              | C <sub>15</sub> H <sub>11</sub> O <sub>7</sub> | D-gal               |
| 2    | 14.0     | 515                    | 465.1026 | C <sub>21</sub> H <sub>21</sub> O <sub>12</sub> | 303.0500              | C <sub>15</sub> H <sub>11</sub> O <sub>7</sub> | D-glc               |
| 3    | 15.0     | 515                    | 449.1079 | C <sub>21</sub> H <sub>21</sub> O <sub>11</sub> | 287.0548              | C <sub>15</sub> H <sub>11</sub> O <sub>6</sub> | Cy-gal              |
| 4    | 17.0     | 515                    | 435.0920 | C <sub>20</sub> H <sub>19</sub> O <sub>11</sub> | 303.0500              | C <sub>15</sub> H <sub>11</sub> O <sub>7</sub> | D-ara               |
| 5    | 22.0     | 515                    | 449.1079 | C <sub>21</sub> H <sub>21</sub> O <sub>11</sub> | 287.0548              | C <sub>15</sub> H <sub>11</sub> O <sub>6</sub> | Cy-glc              |
| 6    | 24.0     | 515                    | 419.1000 | C <sub>20</sub> H <sub>19</sub> O <sub>10</sub> | 287.0548              | C <sub>15</sub> H <sub>11</sub> O <sub>6</sub> | Cy-ara              |
| 7    | 25.0     | 515                    | 479.1180 | C <sub>22</sub> H <sub>23</sub> O <sub>12</sub> | 317.0655              | C <sub>16</sub> H <sub>13</sub> O <sub>7</sub> | Pet-gal             |
| 8    | 28.5     | 515                    | 479.1180 | C <sub>21</sub> H <sub>21</sub> O <sub>12</sub> | 317.0655              | C <sub>16</sub> H <sub>13</sub> O <sub>7</sub> | Pet-glc             |
| 9    | 29.0     | 515                    | 463.1232 | C <sub>22</sub> H <sub>23</sub> O <sub>11</sub> | 301.0705              | C <sub>13</sub> H <sub>13</sub> O <sub>6</sub> | Peo-gal             |
| 10   | 30.2     | 515                    | 433.1127 | C <sub>21</sub> H <sub>21</sub> O <sub>11</sub> | 317.0655              | C <sub>16</sub> H <sub>13</sub> O <sub>7</sub> | Pet-ara             |
| 11   | 32.0     | 515                    | 463.1232 | C <sub>22</sub> H <sub>23</sub> O <sub>11</sub> | 301.0705              | C <sub>13</sub> H <sub>13</sub> O <sub>6</sub> | Peo-glc             |
| 12   | 32.5     | 515                    | 493.1339 | C <sub>23</sub> H <sub>25</sub> O <sub>12</sub> | 331.0810              | C <sub>17</sub> H <sub>15</sub> O <sub>7</sub> | Mv-gal              |
| 13   | 33.2     | 515                    | 433.1128 | C <sub>21</sub> H <sub>21</sub> O <sub>10</sub> | 301.0705              | C <sub>13</sub> H <sub>13</sub> O <sub>6</sub> | Peo-ara             |
| 14   | 34.5     | 515                    | 493.1339 | C <sub>23</sub> H <sub>25</sub> O <sub>12</sub> | 331.0810              | C <sub>17</sub> H <sub>15</sub> O <sub>7</sub> | Mv-glc              |
| 15   | 35.4     | 515                    | 463.1231 | C <sub>22</sub> H <sub>23</sub> O <sub>11</sub> | 331.0810              | C <sub>17</sub> H <sub>15</sub> O <sub>7</sub> | Mv-ara              |
| 16   | 37.0     | 515                    | 507.1127 | C <sub>23</sub> H <sub>23</sub> O <sub>13</sub> | 303.0490              | C <sub>15</sub> H <sub>11</sub> O <sub>7</sub> | D-Hex-Ac            |
| 17   | 40.0     | 515                    | 491.1180 | C <sub>23</sub> H <sub>23</sub> O <sub>12</sub> | 287.0548              | C <sub>15</sub> H <sub>11</sub> O <sub>6</sub> | Cy-Hex-Ac           |
| 18   | 41.0     | 515                    | 521.1280 | C <sub>24</sub> H <sub>25</sub> O <sub>13</sub> | 317.0655              | C <sub>16</sub> H <sub>13</sub> O <sub>7</sub> | Pet-Hex-Ac          |
| 19   | 42.0     | 515                    | 535.1444 | C <sub>25</sub> H <sub>27</sub> O <sub>13</sub> | 331.0810              | C <sub>17</sub> H <sub>15</sub> O <sub>7</sub> | Mv-gal-Ac           |
| 20   | 43.4     | 515                    | 505.1330 | C <sub>24</sub> H <sub>25</sub> O <sub>12</sub> | 301.0705              | C <sub>13</sub> H <sub>13</sub> O <sub>6</sub> | Peo-Hex-Ac          |
| 21   | 44.5     | 515                    | 535.1445 | C <sub>25</sub> H <sub>27</sub> O <sub>13</sub> | 331.0810              | C <sub>17</sub> H <sub>15</sub> O <sub>7</sub> | Mv-glc-Ac           |

D: Delphinidin. Cy: Cyanidin. Pet: Petunidin. Peo: Peonidin. Mv: Malvidin. gal: galactose. glc: glucose. ara: arabinose. Hex: Hexose. Ac: acetate.
